# Supplementary material for: Foliar application of iron-based nanofertilizers to wheat grown in a Cd-contaminated field: implications for food safety and biofortification
Source: Royal Society of Chemistry journal article supplement (doi:10.1039/d3en00958k), 2024-01-01
Supplement: d3en00958k1.pdf [file d3en00958k1.pdf]

*Supplementary Information for:*

## **Foliar application of iron-based nanofertilizers to wheat grown in a Cd-contaminated field: Implications for food safety and biofortification**

Jiapan Lian <sup>a</sup>, Liping Cheng <sup>a</sup>, Xiwei Huang <sup>a</sup>, Xin Wang <sup>a</sup>, Yi Wang <sup>b</sup>, Chaoyi Deng <sup>b</sup>, Xiaoping Xin <sup>c</sup>, Tong Zou <sup>a</sup>, Yonglong Chen <sup>a</sup>, Hongyu Yu <sup>a</sup>, Weitao Liu <sup>d</sup>, Jianqing Pan <sup>e</sup>, Zhenli He <sup>c</sup>, Xiaoe Yang <sup>a,\*</sup>, Jason C. White <sup>b</sup>

<sup>a</sup> Ministry of Education (MOE) Key Laboratory of Environmental Remediation and Ecosystem Health, College of Environmental and Resources Sciences, Zhejiang University, Hangzhou, 310058, China

<sup>b</sup> The Connecticut Agricultural Experiment Station, New Haven, Connecticut 06504, USA

<sup>c</sup> Department of Soil, Water and Ecosystem Sciences, Indian River Research and Education Center, University of Florida-IFAS, Fort Pierce, FL 34945, USA

<sup>d</sup> MOE Key Laboratory of Pollution Processes and Environmental Criteria, Tianjin Engineering Research Center of Environmental Diagnosis and Contamination Remediation, College of Environmental Science and Engineering, Nankai University, Tianjin 300350, China

<sup>e</sup> Agriculture Bureau of Changxing County, Zhejiang Province, Huzhou, 323000, China

**\*Corresponding Author:** Xiaoe Yang

**E-mail:** xeyang@zju.edu.cn (X.E. Yang); ORCID: 0000-0003-2725-2665

**Full Postal Address:** No. 866 Yuhangtang Road, College of Environmental and Resources Sciences, Zhejiang University, Hangzhou, 310058, China

**Phone/Fax:** +86 0571 88982907.

**Contents:**

**Figure S1.** Mean precipitation and temperature of field site during wheat cultivation.

**Figure S2.** SPAD values of wheat leaves after foliar application of four Fe NMs.

**Figure S3.** BCF and TF of Cd in wheat tissues after foliar application of four different Fe NMs.

**Figure S4.** Cd and Fe distribution pattern in the aboveground wheat tissues after foliar application of four different Fe NMs.

**Figure S5.** PCA analysis of ionic profile in different wheat tissues after foliar application of four different Fe NMs.

**Figure S6.** Nutrient concentrations of different wheat tissues under foliar application of four Fe NMs.

**Figure S7.** The estimated Fe daily intake and hazard quotient of Fe through wheat flour consumption treated with four different Fe NMs.

**Number of pages: 9**

**Number of figures: 7**

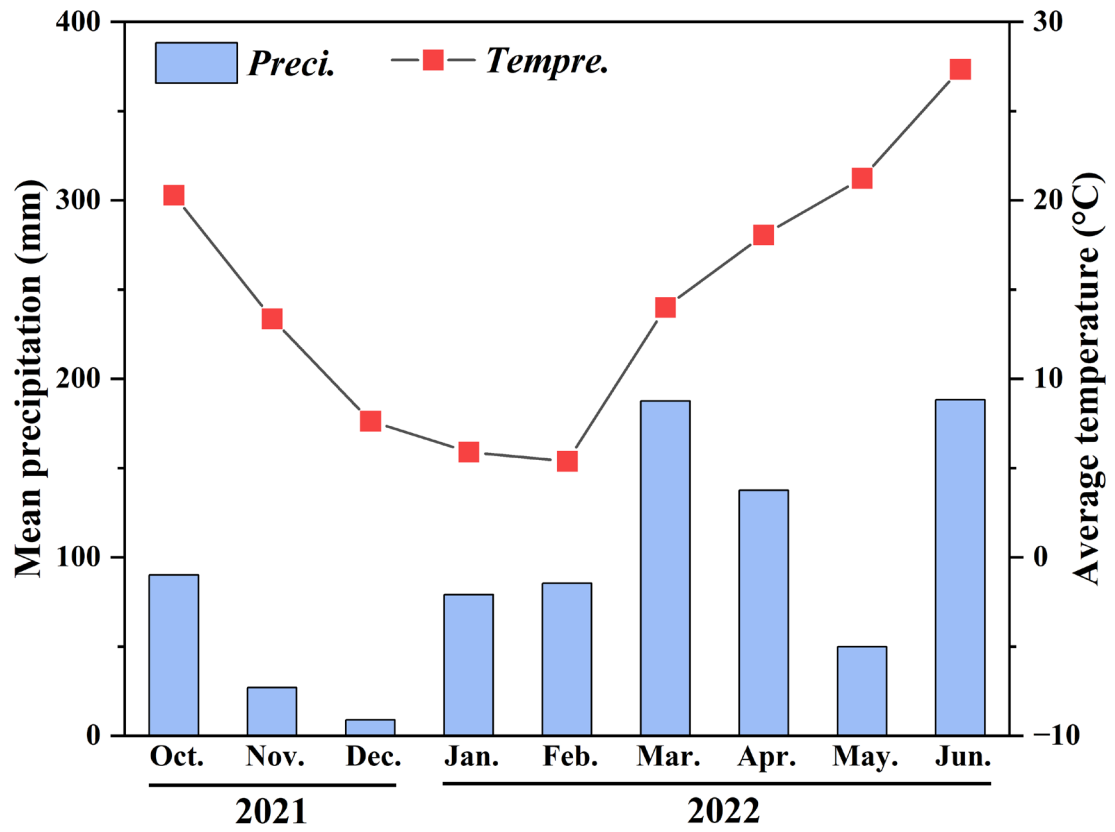

**Figure S1.** Mean precipitation and temperature of field site during wheat cultivation.

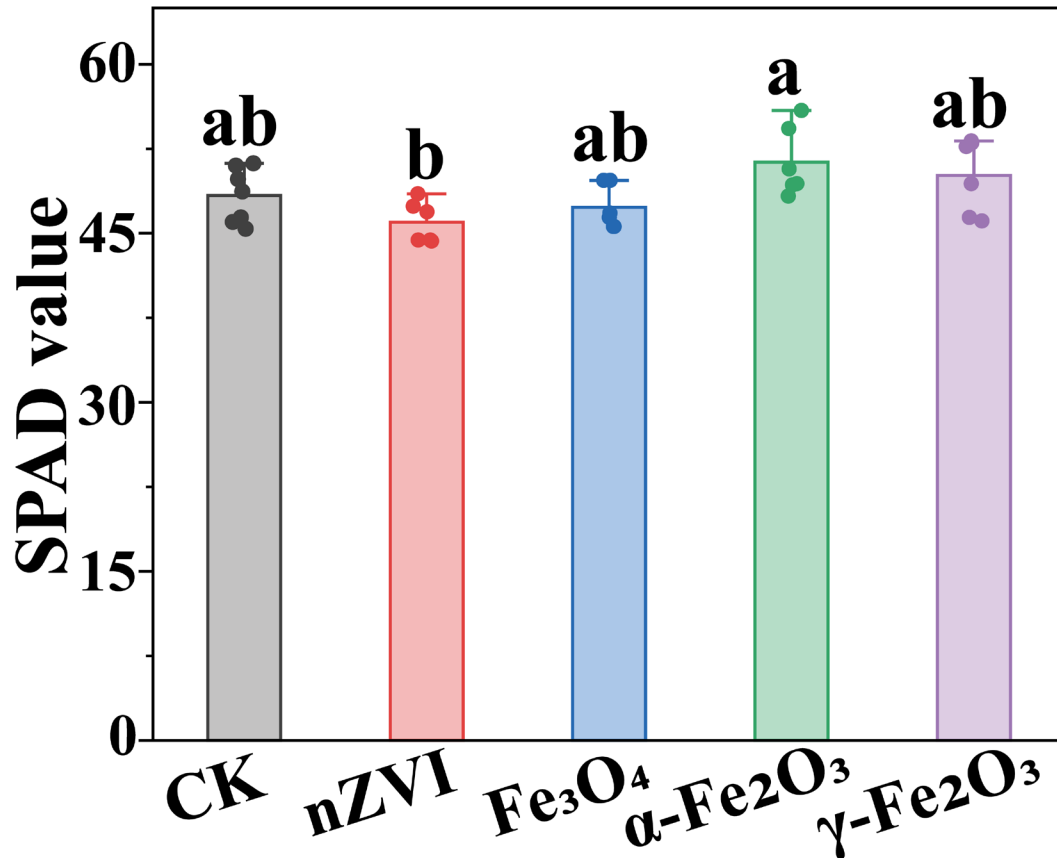

**Figure S2.** SPAD values of wheat leaves after foliar application of four Fe NMs. Different letters above bars represent significant differences ( $p < 0.05$ ) determined by one-way analysis of variance (ANOVA) with Tukey's multiple comparisons test.

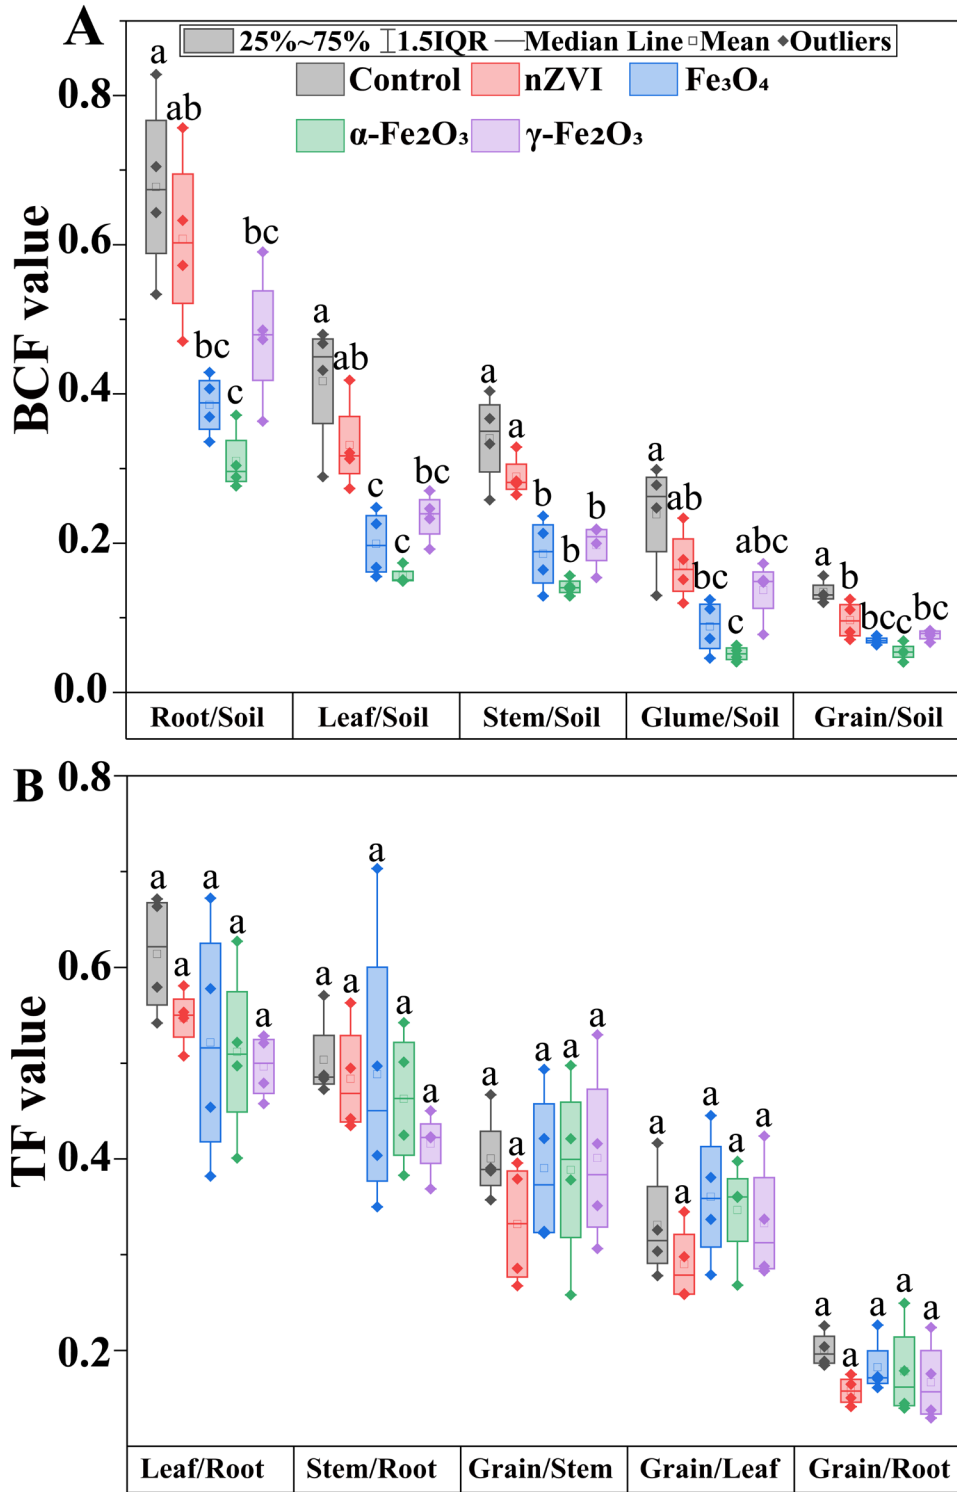

**Figure S3.** BCF and TF of Cd in wheat tissues after foliar application of four different Fe NMs. Different letters above bars represent significant differences ( $p < 0.05$ ) determined by one-way analysis of variance (ANOVA) with Tukey's multiple comparisons test.

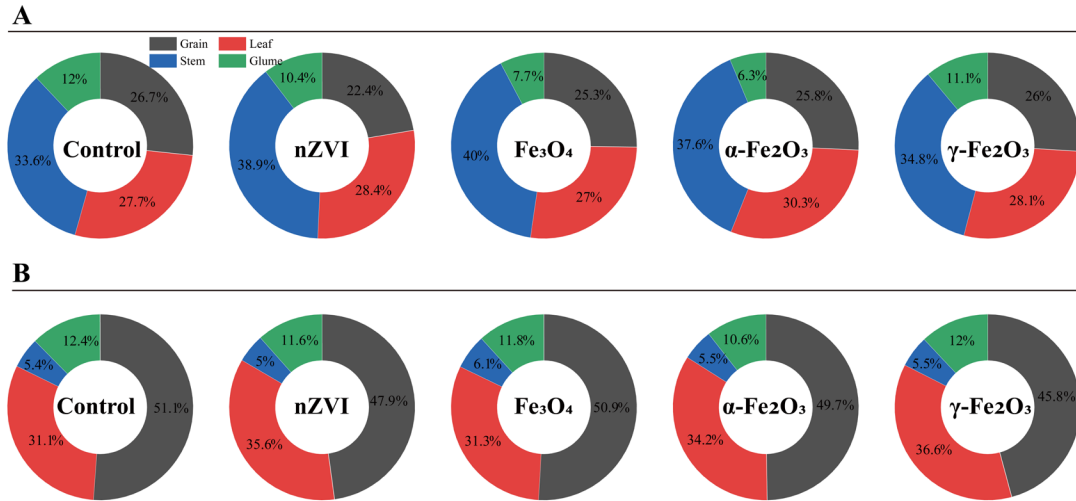

**Figure S4.** Cd (A) and Fe distribution pattern (B) in the aboveground wheat tissues after foliar application of four different Fe NMs. NS: None significance.

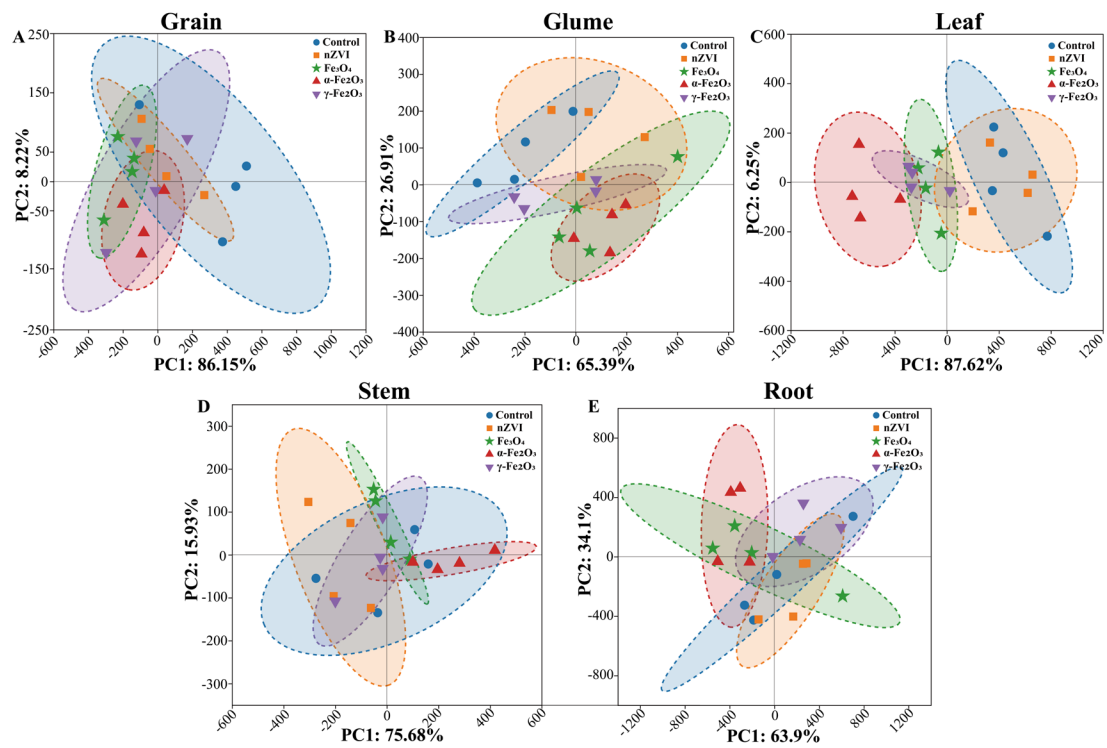

**Figure S5.** PCA analysis of ionomic profile in different wheat tissues after foliar application of four different Fe NMs.

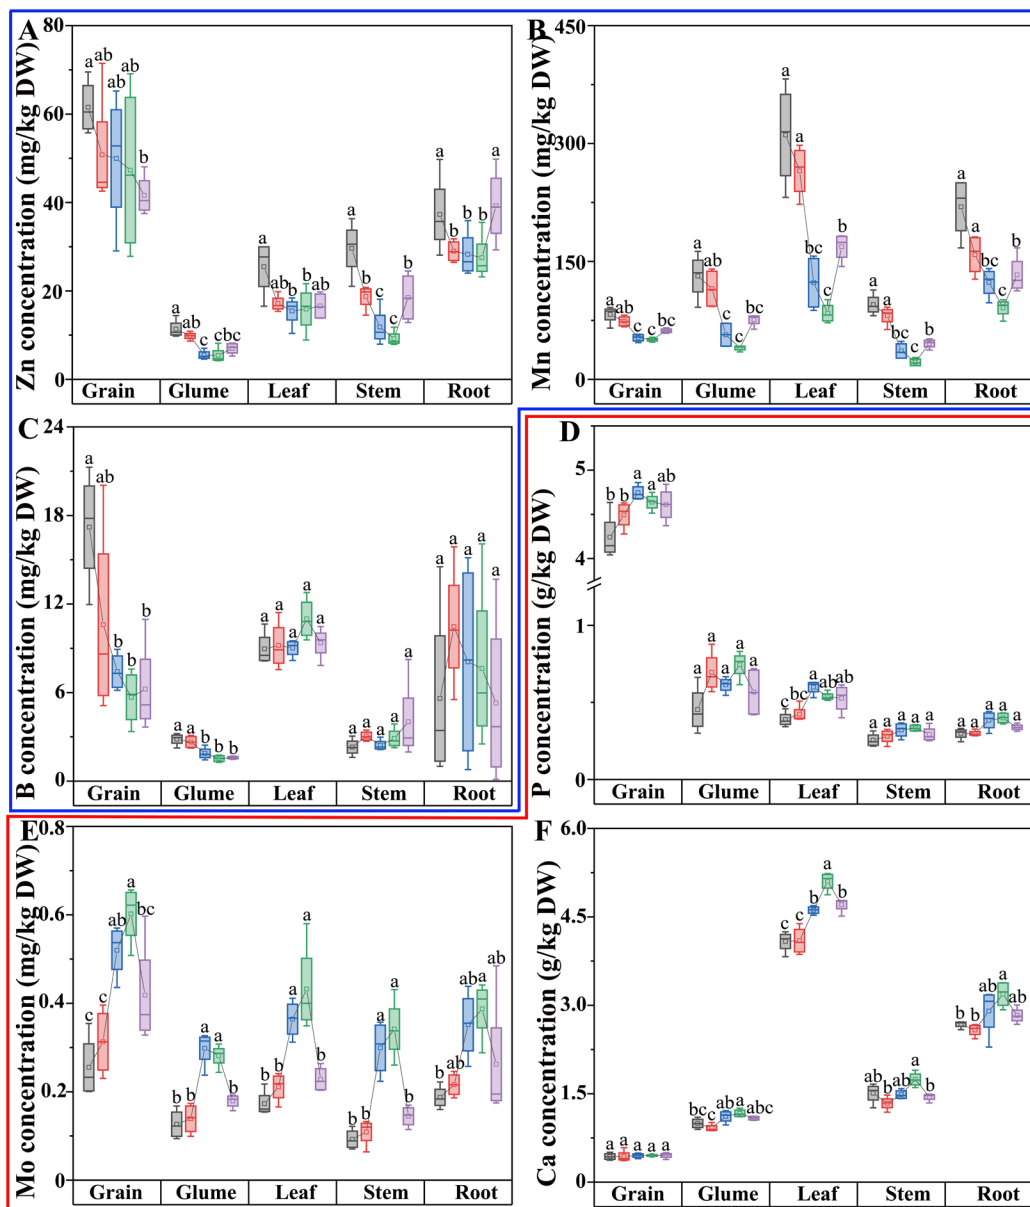

**Figure S6.** Nutrient concentrations of different wheat tissues under foliar application of four Fe NMs. Increased element concentrations inside the blue box line (A-C). Decreased element concentrations inside the red box line (D-F). Different letters above bars represent significant differences ( $p < 0.05$ ) determined by one-way analysis of variance (ANOVA) with Tukey's multiple comparisons test.



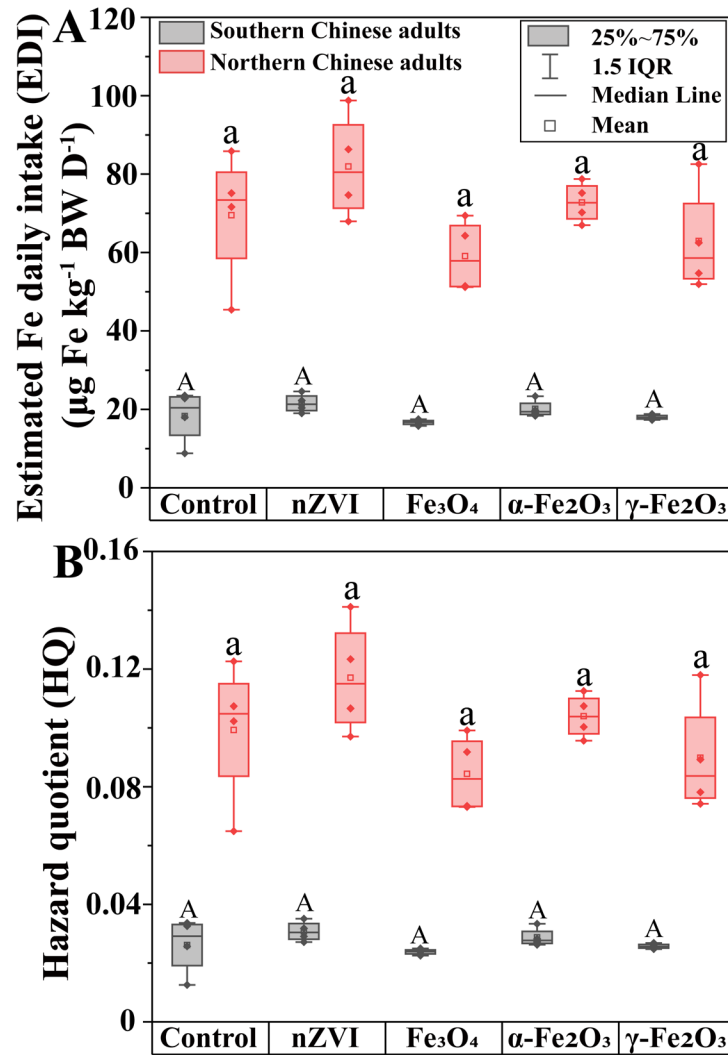

**Figure S7.** The estimated Fe daily intake (EDI) and hazard quotient (HQ) of Fe through wheat flour consumption treated with four different Fe NMs. Different letters above bars represent significant differences ( $p < 0.05$ ) determined by one-way analysis of variance (ANOVA) with Tukey's multiple comparisons test.
